# Supplementary material for: Photoswitching properties of hairpin ODNs with azobenzene derivatives at the loop position
Source: Royal Society of Chemistry journal article supplement (doi:10.1039/c4md00378k), 2014-12-15

## *Supporting Information*

# **Photoswitching properties of hairpin ODNs with azobenzene derivatives in the loop**

Li Wu,<sup>a,b</sup> Ya Wu,<sup>c</sup> Hongwei Jin,<sup>\*b</sup> Liangren Zhang,<sup>b</sup> Yujian He,<sup>\*a,b</sup> and  
Xinjing Tang<sup>\*b</sup>

## **Contents**

|                                                                                                                      |     |
|----------------------------------------------------------------------------------------------------------------------|-----|
| 1. Melting temperature of azobenzene modified ODNs in different concentrations .....                                 | S2  |
| 2. Native PAGE of azobenzene modified ODNs.....                                                                      | S5  |
| 3. Typical HPLC analysis of trans-form and cis-form of azobenzene linked hairpins.....                               | S7  |
| 4. UV spectral change of azobenzene linker and azobenzene modified ODNs with UV irradiation.....                     | S8  |
| 5. Typical UV melting curves for trans-form (solid line) and cis-form (broken line) of azobenzene modified ODNs..... | S11 |
| 6. CD spectra of Az1 and Az2 as well as azobenzene modified ODNs with or without UV irradiation .....                | S13 |
| 7. Isomerization behavior of cis-form of azobenzene modified ODNs upon heating.....                                  | S16 |
| 8. MS of azobenzene modified ODNs.....                                                                               | S16 |

## 1. Melting temperature of azobenzene modified ODNs in different concentrations

**Figure S1.** The melting temperatures of azobenzene modified ODNs versus their concentrations from 2  $\mu\text{M}$  to 140  $\mu\text{M}$  in 100 mM NaCl buffer containing 0.1 mM  $\text{Na}_2\text{EDTA}$  / 10 mM  $\text{Na}_2\text{HPO}_4\text{-NaH}_2\text{PO}_4$ , pH=7.0.

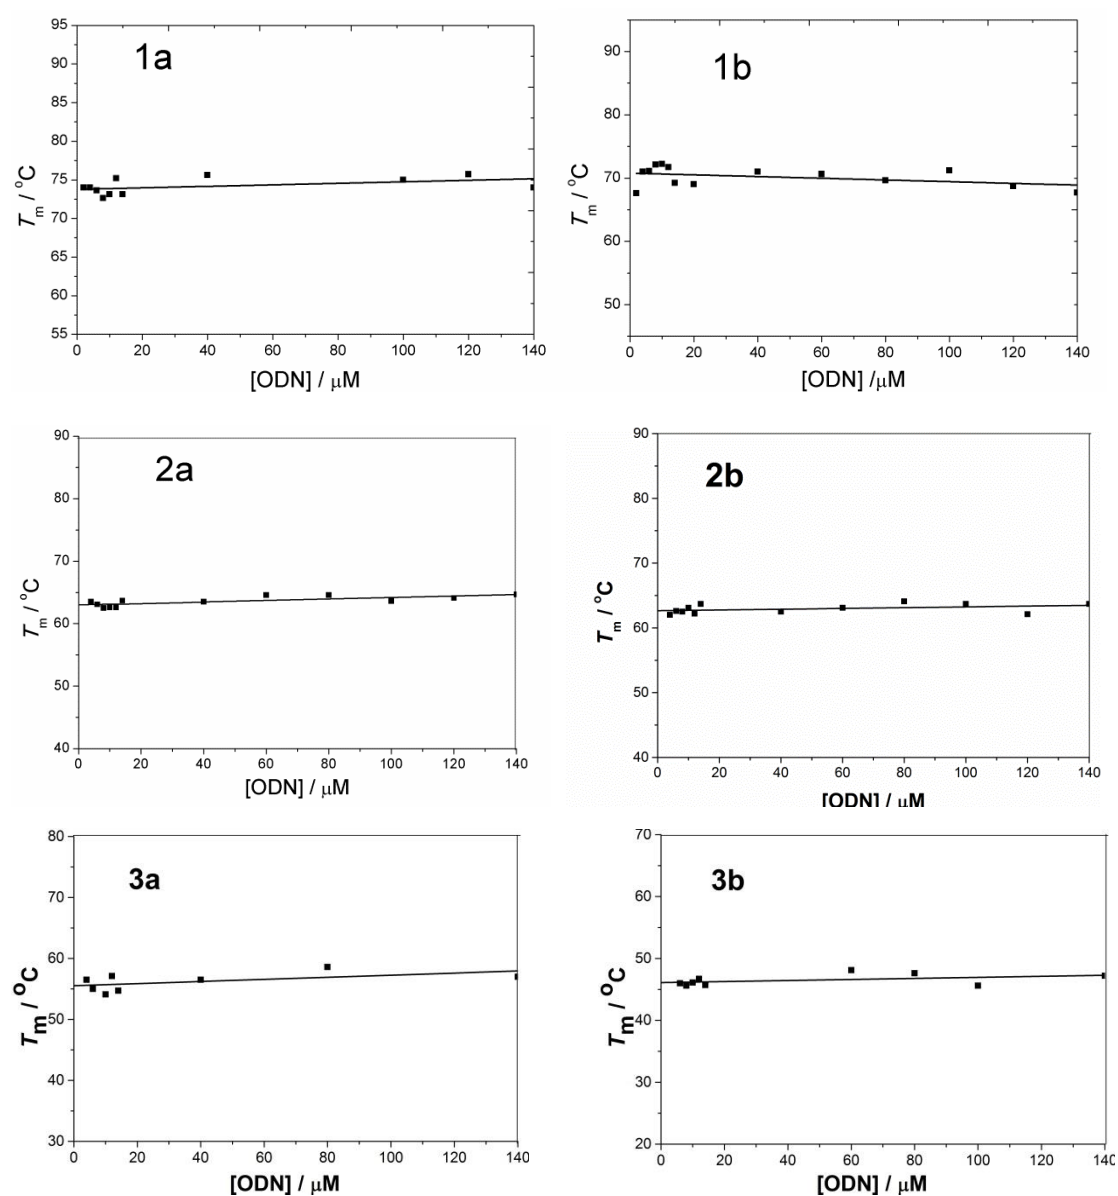

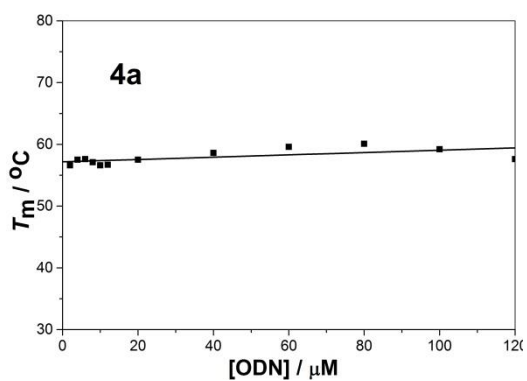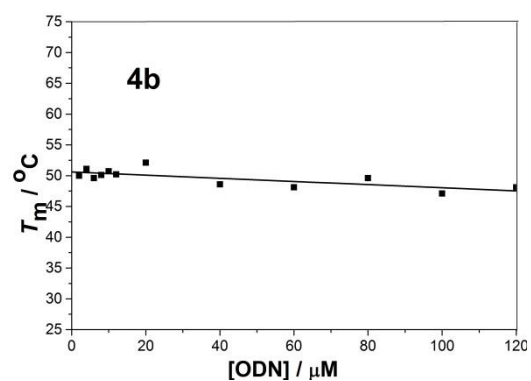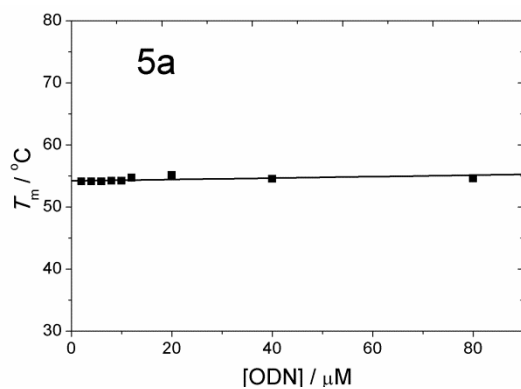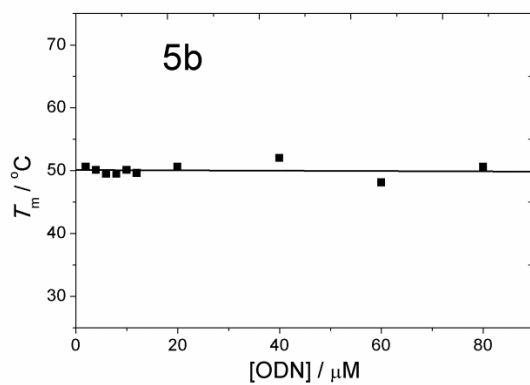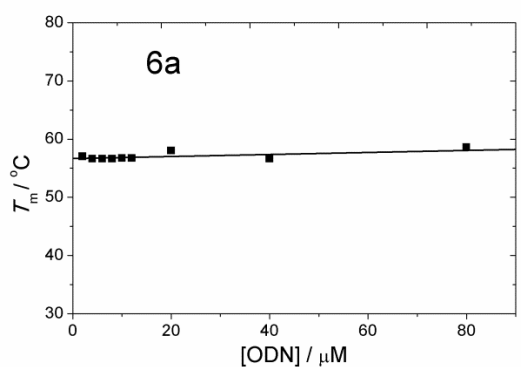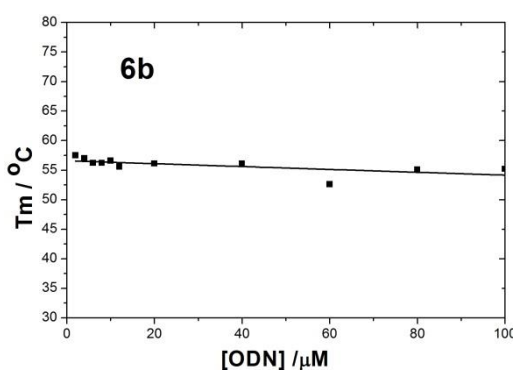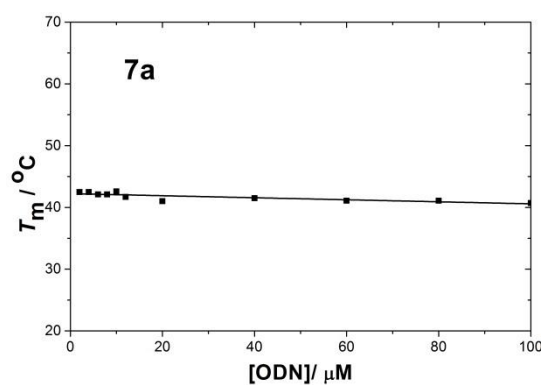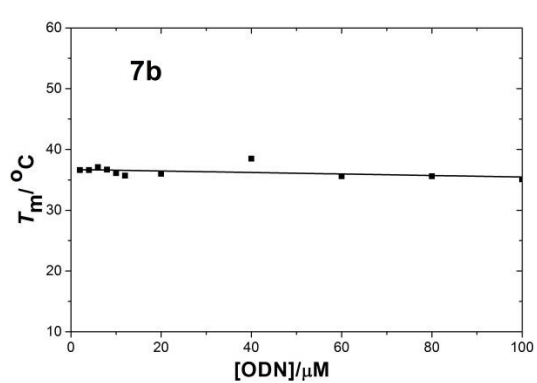

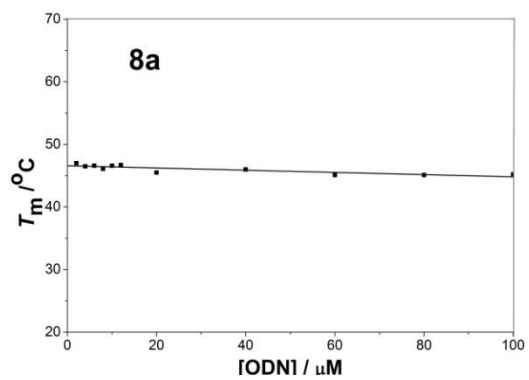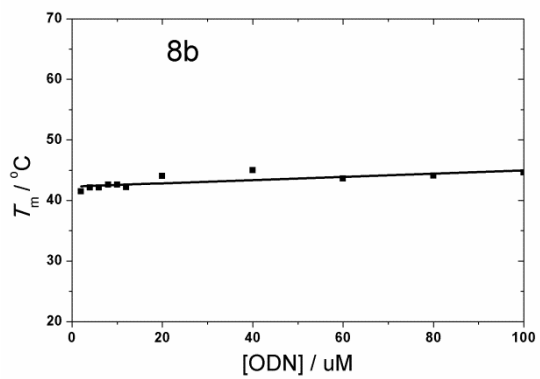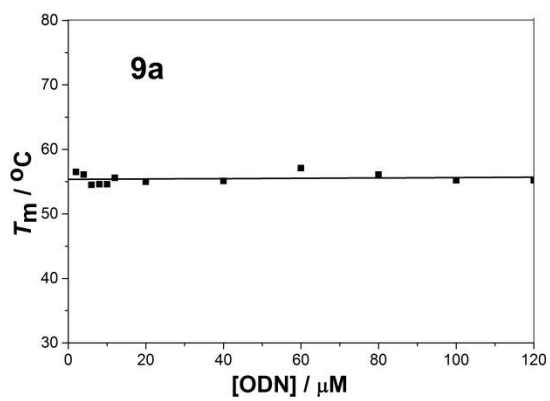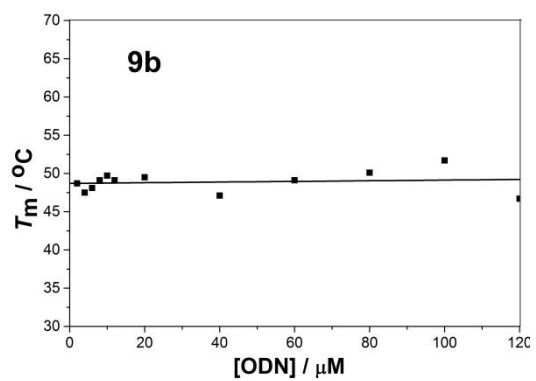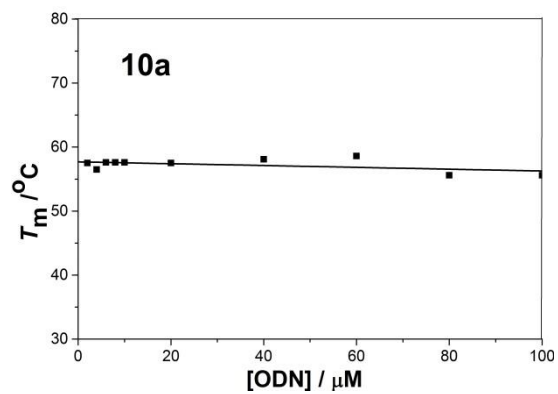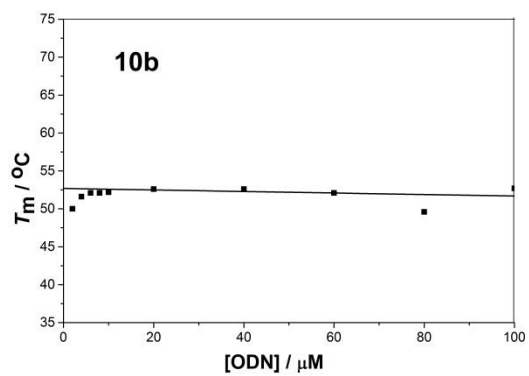

## 2. Native PAGE of azobenzene modified ODNs

**Figure S2.** Native polyacrylamide gel electrophoresis pattern for trans-azobenzene linked hairpins. **(a)** Lane1: hairpin marker 5'-GATCTTTTGATC-3' (**2c**), Lane2: [**2a**] = 10  $\mu$ M, Lane3: [**2a**] = 100  $\mu$ M, Lane4: [**2b**] = 10  $\mu$ M, Lane5: [**2b**] = 100  $\mu$ M, Lane6: [**3a**] = 10  $\mu$ M, Lane7: [**3a**] = 100  $\mu$ M, Lane8: [**3b**] = 10  $\mu$ M, Lane9: [**3b**] = 100  $\mu$ M, Lane10: hairpin marker, 5'-AAAGTTTTCTTT-3' (**3c**). **(b)** Lane1: hairpin marker 5'-AAAAATTTTTTTTTT-3' (**9c**), Lane2: [**9a**] = 10  $\mu$ M, Lane3: [**9a**] = 100  $\mu$ M, Lane4: [**9b**] = 10  $\mu$ M, Lane5: [**9b**] = 100  $\mu$ M, Lane6: [**10a**] = 10  $\mu$ M, Lane7: [**10a**] = 100  $\mu$ M, Lane8: [**10b**] = 10  $\mu$ M, Lane9: [**10b**] = 100  $\mu$ M, Lane10: hairpin marker, 5'-AAAAAATTTTTTTTTT-3' (**10c**). **(c)** Lane1: hairpin marker 5'-AATAGTTTTCTATT-3' (**5c**), Lane2: [**5a**] = 10  $\mu$ M, Lane3: [**5a**] = 100  $\mu$ M, Lane4: [**5b**] = 10  $\mu$ M, Lane5: [**5b**] = 100  $\mu$ M, Lane6: hairpin marker, 5'-AATACTTTTTGTATT-3' (**6c**), Lane7: [**6a**] = 10  $\mu$ M, Lane8: [**6a**] = 100  $\mu$ M, Lane9: [**6b**] = 10  $\mu$ M, Lane10: [**6b**] = 100  $\mu$ M. **(d)** Lane1: hairpin marker 5'-AATAATTTTTTTATT-3' (**7c**), Lane2: [**7a**] = 10  $\mu$ M, Lane3: [**7a**] = 100  $\mu$ M, Lane4: [**7b**] = 10  $\mu$ M, Lane5: [**7b**] = 100  $\mu$ M, Lane6: hairpin marker, 5'-AATATTTTTTATATT-3' (**8c**), Lane7: [**8a**] = 10  $\mu$ M, Lane8: [**8a**] = 100  $\mu$ M, Lane9: [**8b**] = 10  $\mu$ M, Lane10: [**8b**] = 100  $\mu$ M. The samples were loaded into a 20% native gel and the gel was run for 2h under 150V at room temperature.

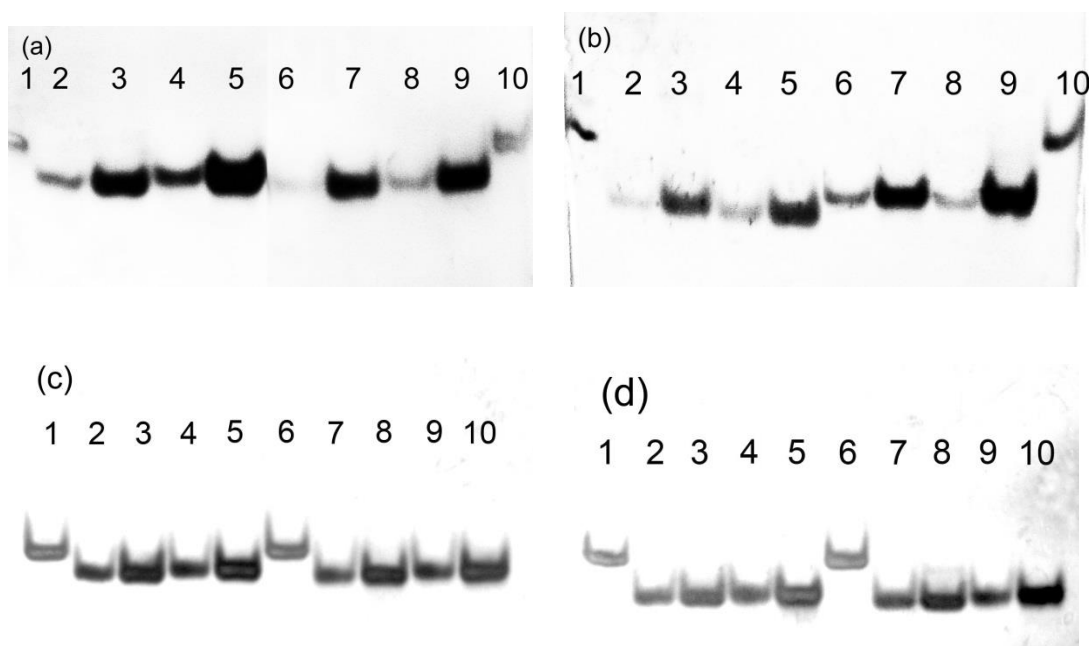

**Figure S3.** Native polyacrylamide gel electrophoresis pattern for trans-azobenzene and cis-azobenzene linked hairpins. **(a)** Lane1: hairpin marker 5'-GATCTTTTGATC-3' (**2c**), Lane2: hairpin marker 5'-AATAGTTTTCTATT-3', Lane3: cis-**1a**, Lane4: trans-**1a**, Lane5: cis-**1b**, Lane6: trans-**1b**, Lane7: cis-**5a**, Lane8: trans-**5a**, Lane9: cis-**5b**, Lane10: trans-**5b**. **(b)** Lane1: hairpin marker 5'-AATAGTTTTCTATT-3', (**2c**), Lane2: trans-**10a**, Lane3: cis-**10a**, Lane4: trans-**9a**, Lane5: cis-**9a**, Lane6: trans-**8a**, Lane7: cis-**8a**. The samples were loaded into a 20% native gel and the gel was run for 4h under 80V at room temperature.

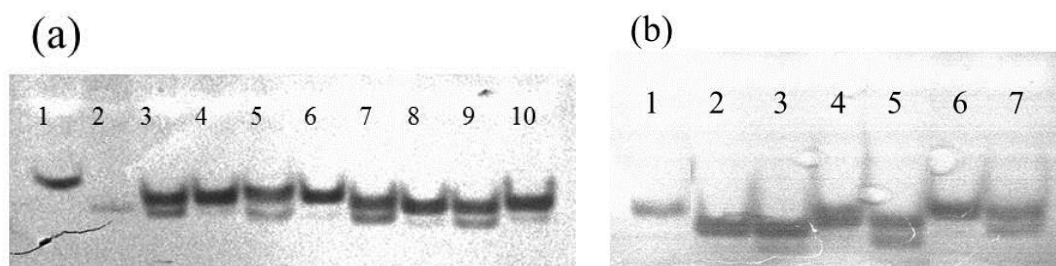

### 3. Typical HPLC analysis of trans-form and cis-form of azobenzene linked hairpins.

**Figure S4** Comparison of HPLC charts of trans-**1a** (before UV light irradiation) and cis-**1a** (after UV light irradiation ). Experiments were performed in a HPLC (JASCO LC-2000 Plus) with TSKgel ODS-80Ts (TOSOH, Japan) column. Set up the wavelength of UV detector at 260 nm and the flow rate at 0.5 mL min<sup>-1</sup>. The sample was separated at 25 °C, and 0.01 M TEAA (pH7.0) and 50% MeOH were used as an elute solvent.

Trans-**1a**

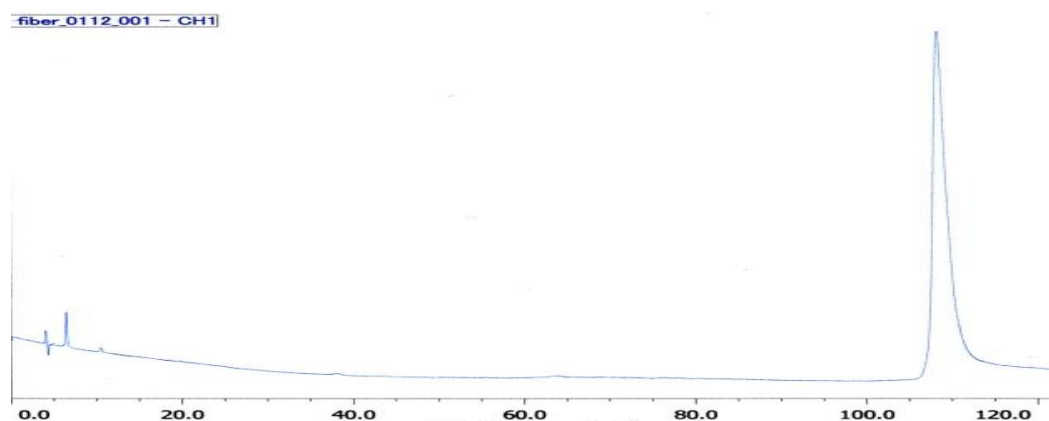

Cis-**1a**

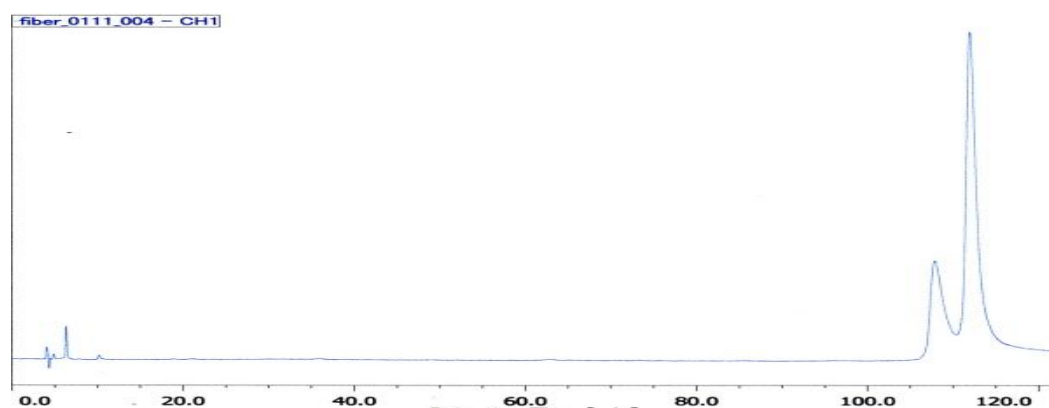

#### 4. UV spectral change of azobenzene linker and azobenzene modified ODNs with UV irradiation

**Figure S5.** UV absorption spectra of **Az1**, **Az2** as well as **Az1** and **Az2** linked conjugates **3a**, **3b** in the trans form in 3:7 MeOH/H<sub>2</sub>O.

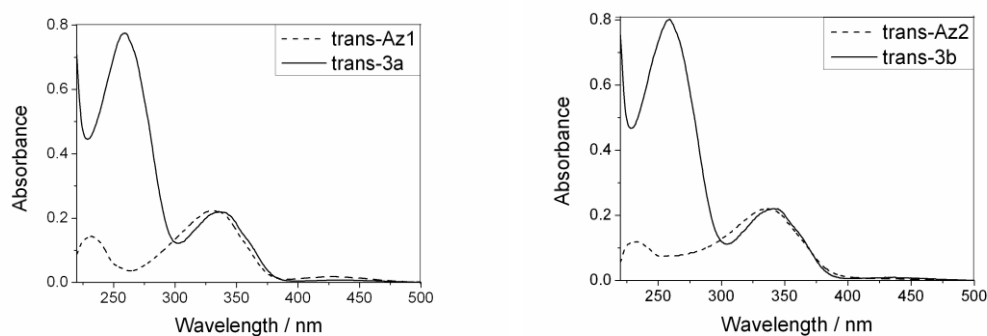

**Figure S6.** UV spectral changes of **Az1**-ODN **1a-10a** and **Az2**-ODN **1b-10b** by illuminating UV light. UV spectra were measured in 10 mM phosphate buffer (pH 7.0) containing 100 mM NaCl and 0.1 mM EDTA, the concentrations of ODNs were 10  $\mu$ M. Inset: plots of absorbance at maximum absorption of azobenzene as a function of UV irradiation time.

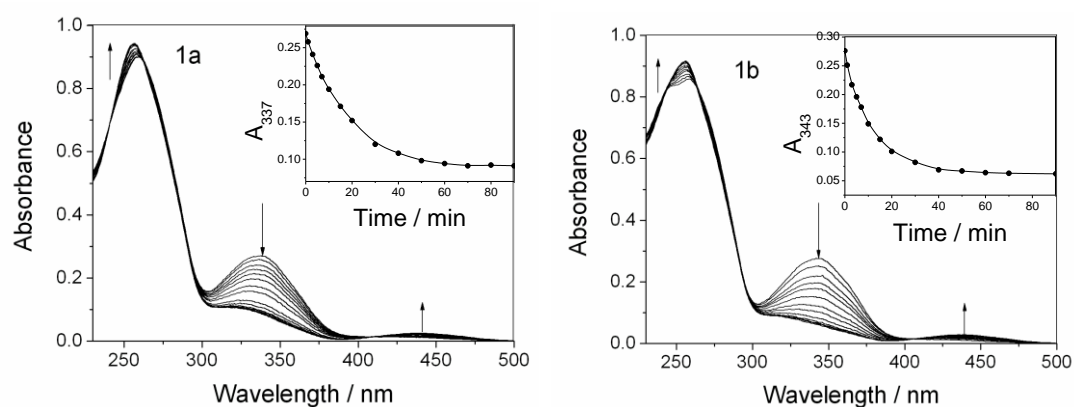



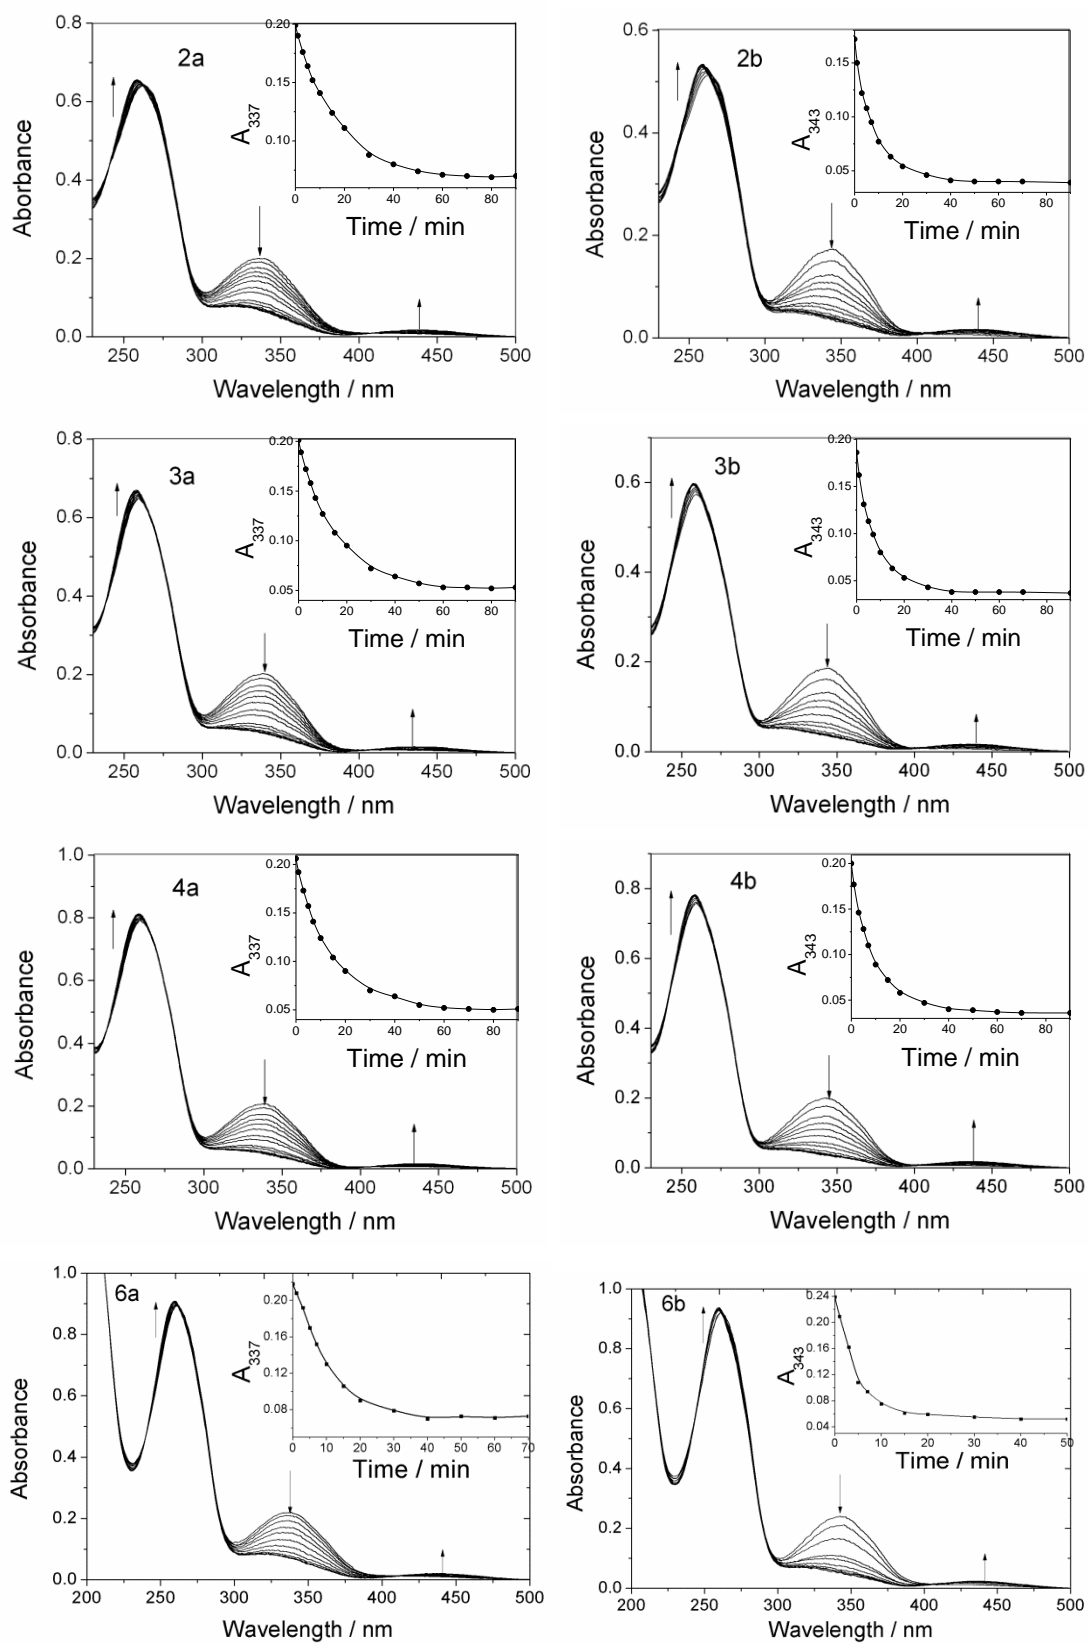

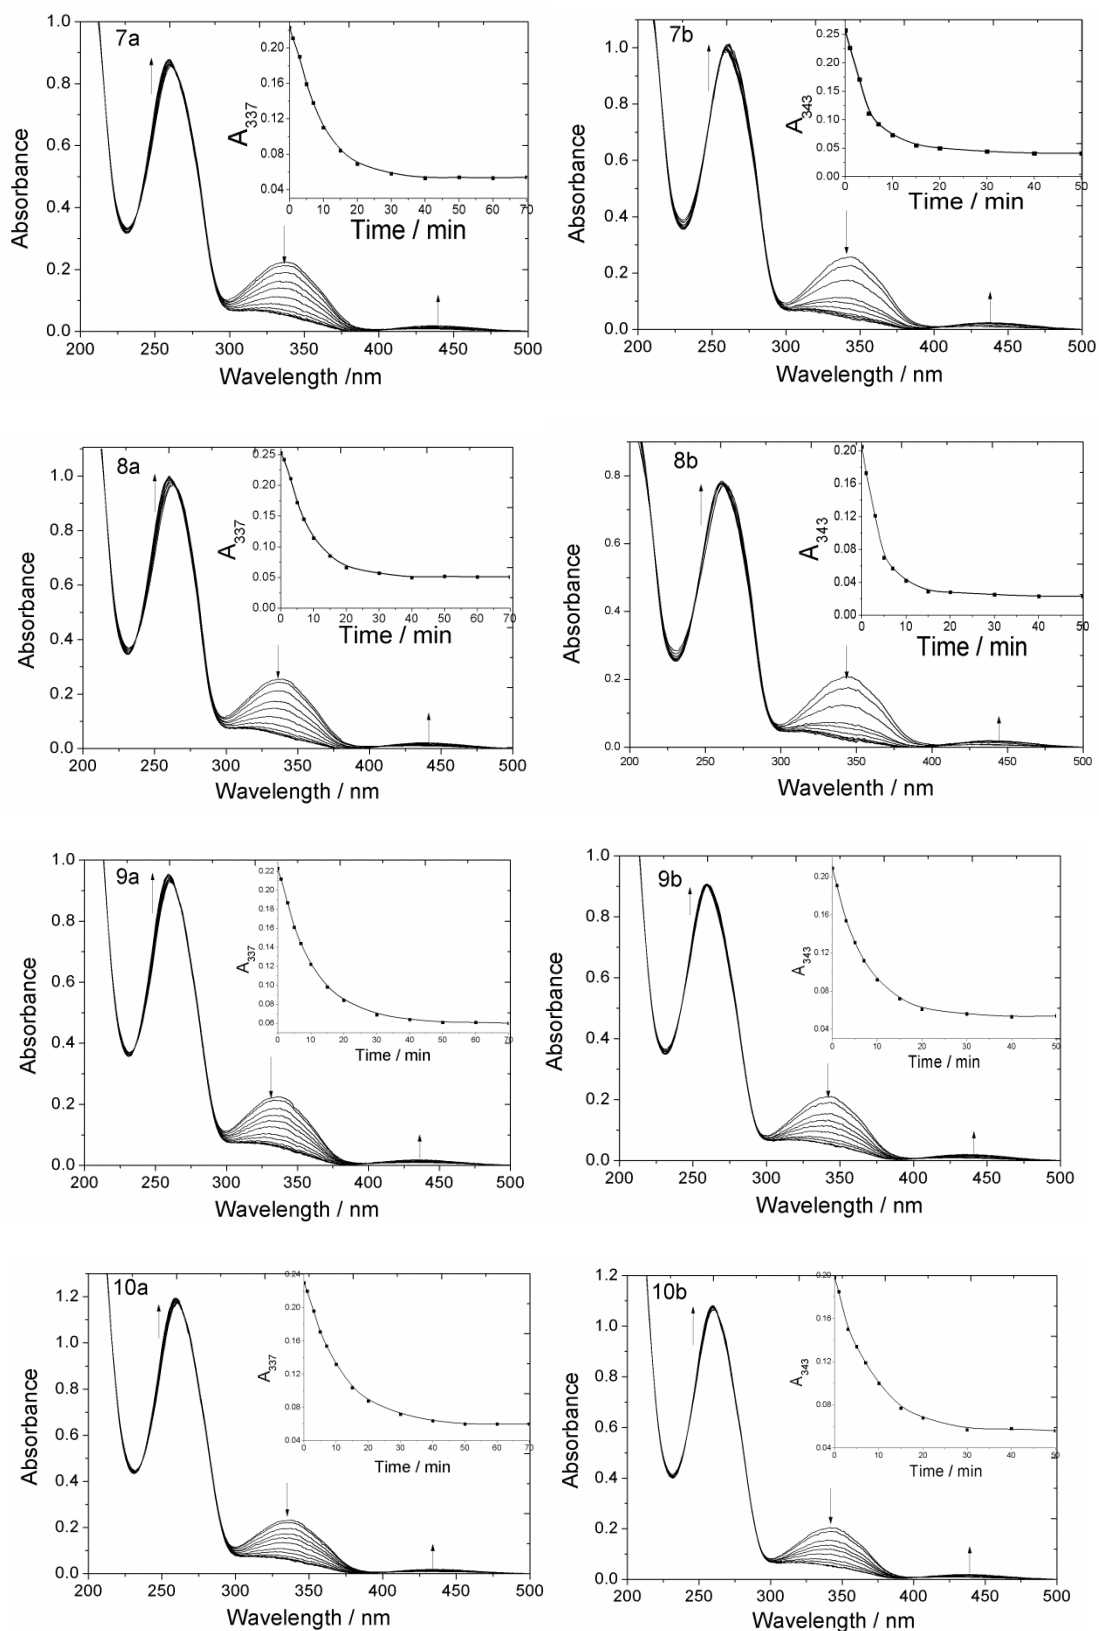

## 5. Typical UV melting curves for trans-form (solid line) and cis-form (broken line) of azobenzene modified ODNs

**Figure S7.** Comparison of UV melting curves for trans-ODNs (solid line) and cis-ODNs (broken line). UV melting experiments were performed in a 10 mM phosphate buffer (pH 7.0) containing 100 mM NaCl and 0.1 mM EDTA. ODN concentrations were adjusted to 6  $\mu$ M.

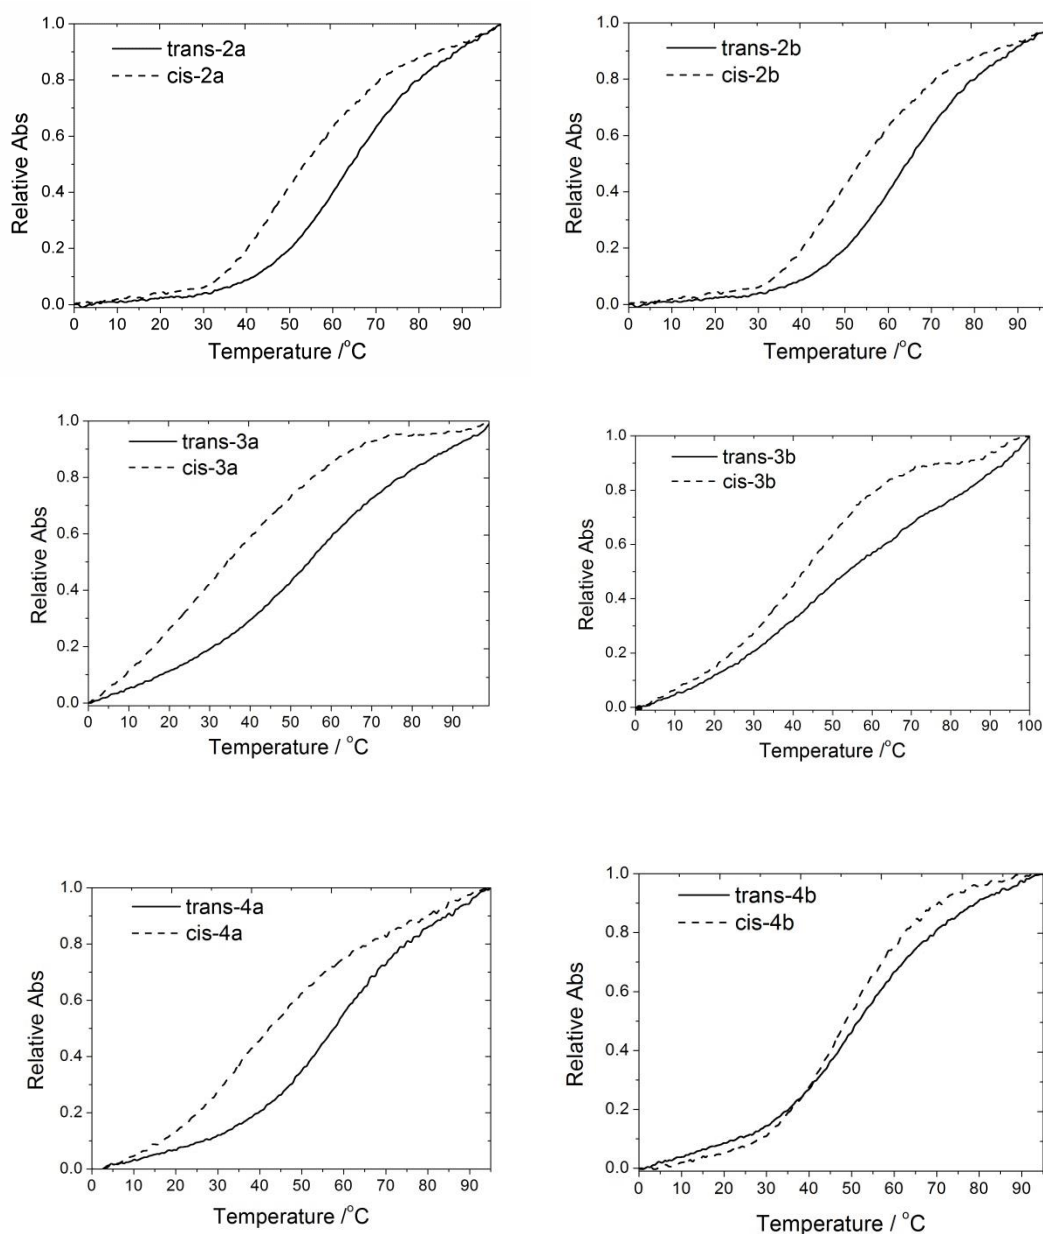

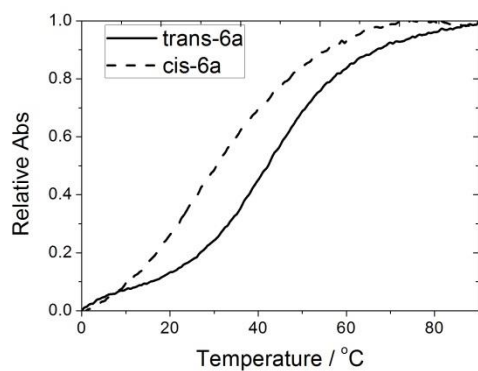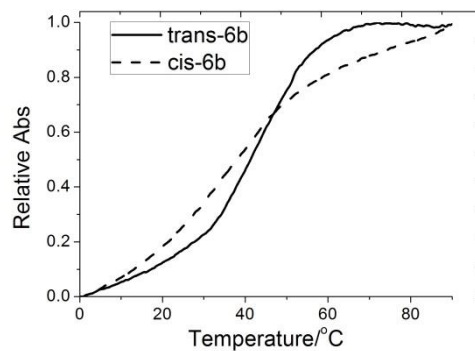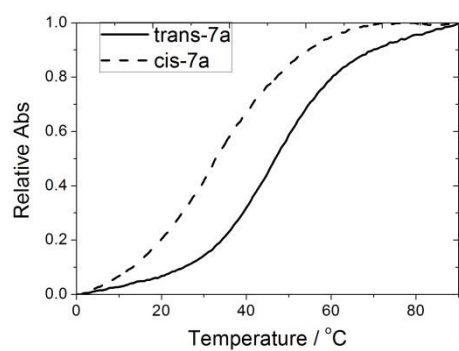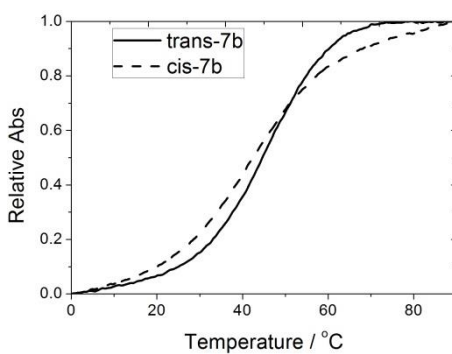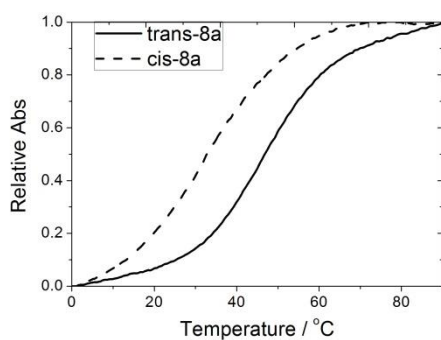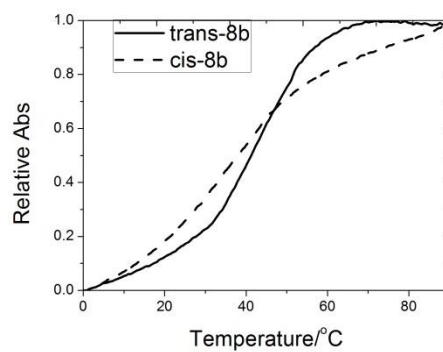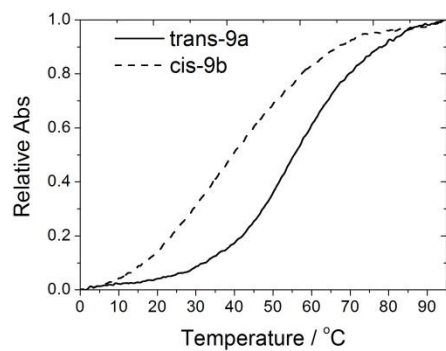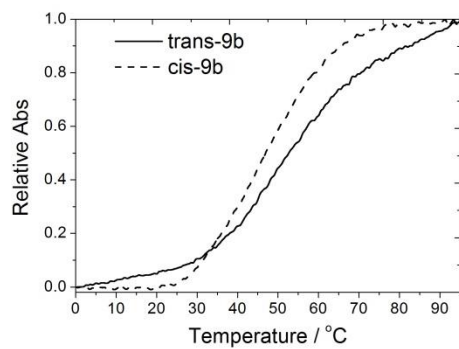

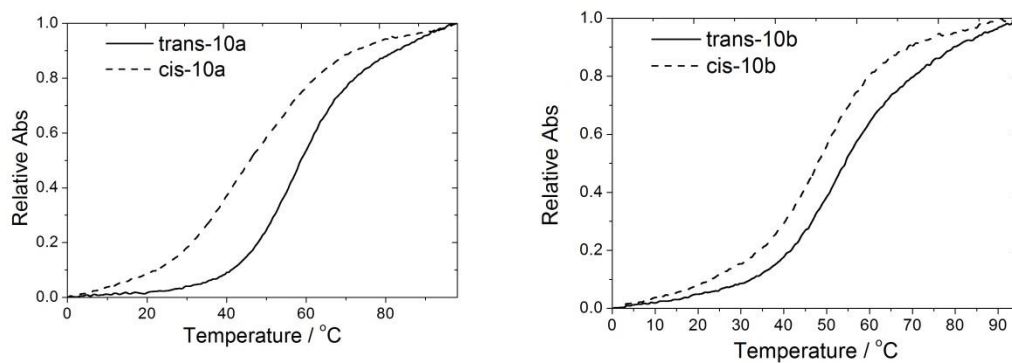

## 6. CD spectra of Az1 and Az2 as well as azobenzene modified ODNs with or without UV irradiation

**Figure S8.** Comparison of CD spectra of trans-form (solid line) and cis-form (dash line) of **Az1** and **Az2** at 4 °C. CD spectra were measured in 3:7 MeOH/H<sub>2</sub>O, the concentrations of **Az1** and **Az2** were 10  $\mu$ M.

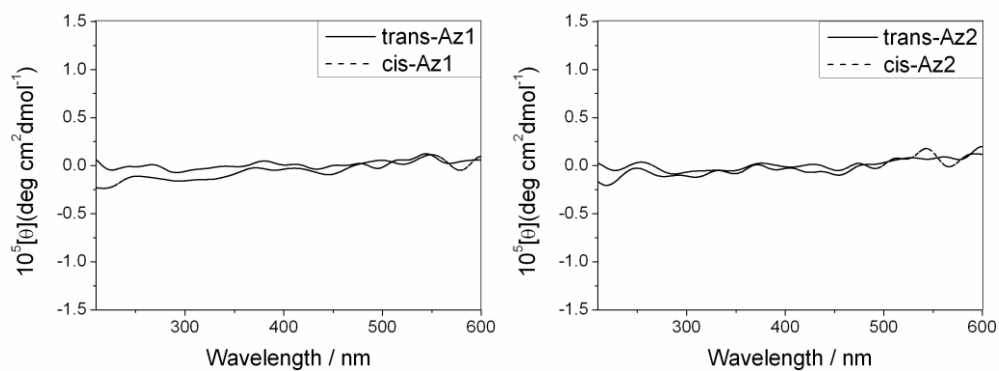

**Figure S9.** Comparison of CD spectra of trans-DNAs (solid line) and cis-DNAs (dash line) at 4 °C. CD spectra were measured in a 10 mM phosphate buffer (pH 7.0) containing 100 mM NaCl and 0.1 mM EDTA, the concentrations of ODNs were 10  $\mu$ M.

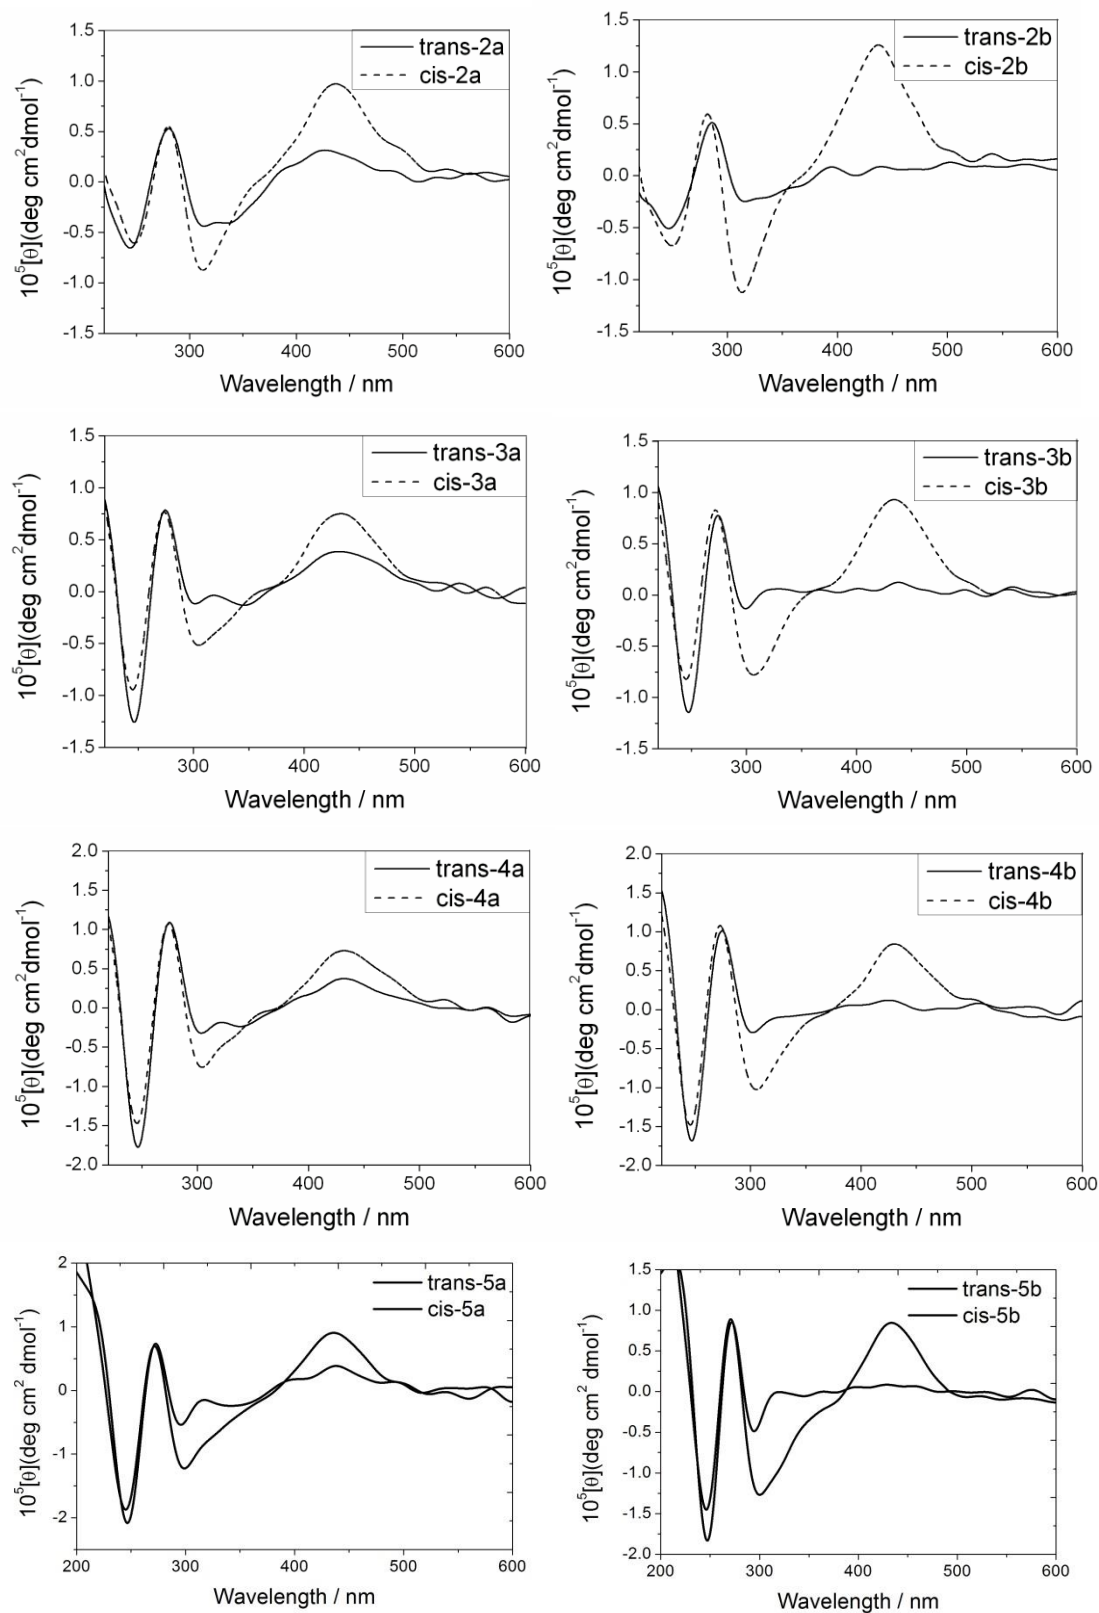

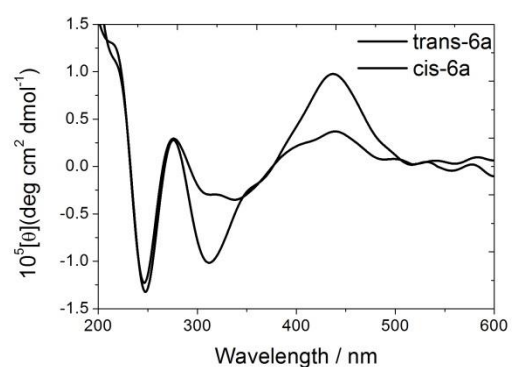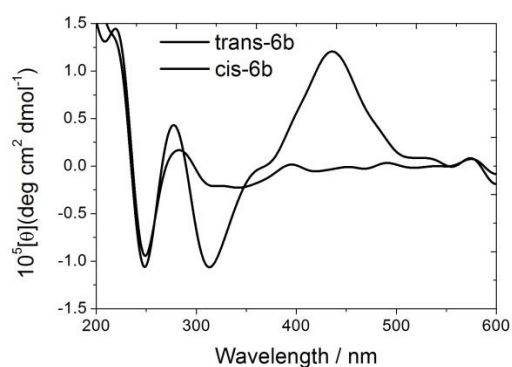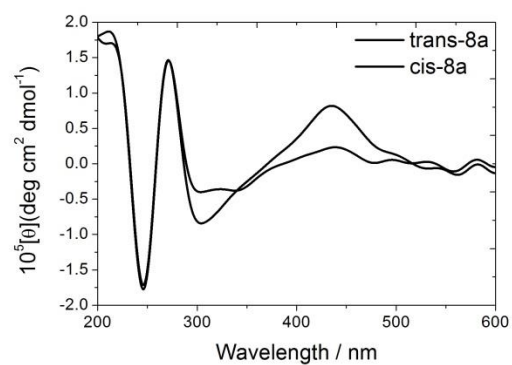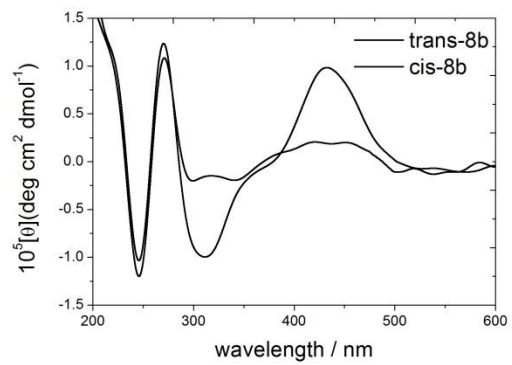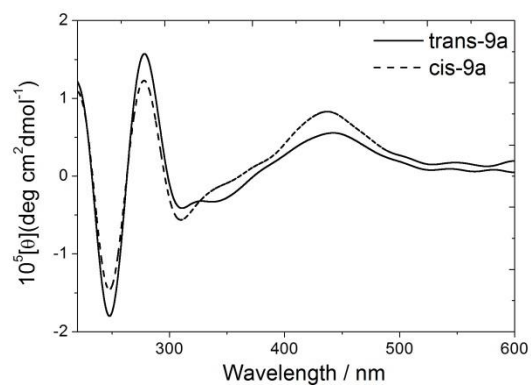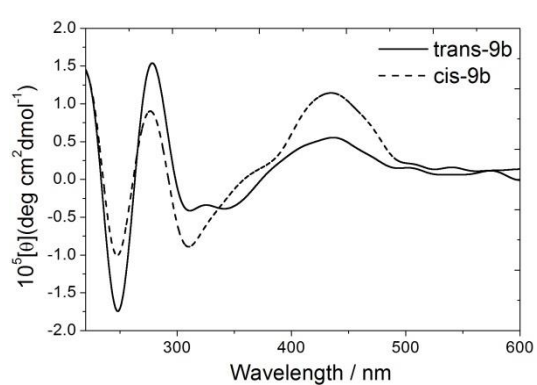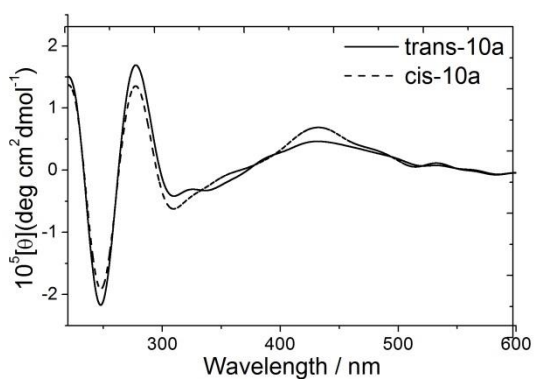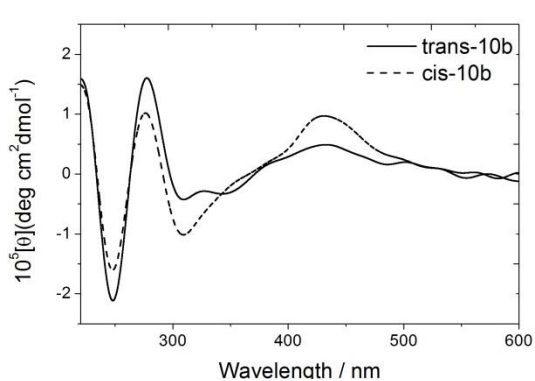

## 7. Isomerization behavior of cis-form of azobenzene modified ODNs upon heating

**Figure S10.** Plots of absorbance at maximum absorbance for cis-**1a** (solid line), cis-**1b** (broken line), cis-**5a** (dot line) and cis-**5b** (broken dot line) as a function of temperature (heating rate: 0.5 °C min<sup>-1</sup>). Experiment was performed in a 10 mM phosphate buffer (pH 7.0) containing 100 mM NaCl and 0.1 mM EDTA. ODN concentrations were adjusted to 10 µM.

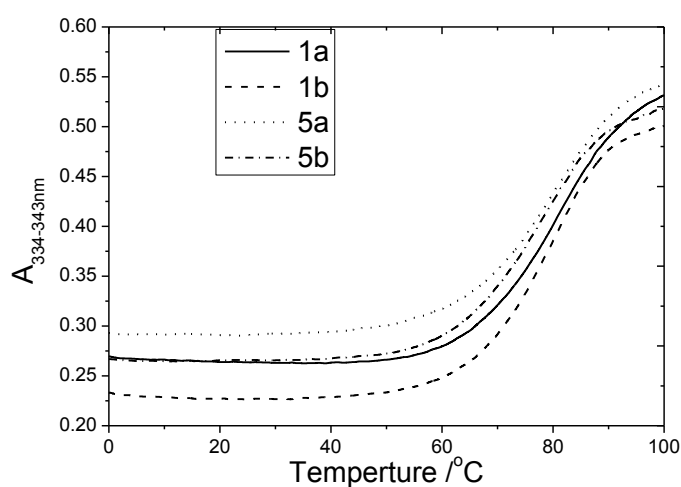

## 8. MS of azobenzene modified ODNs

**Table S1.** The results for MS of the azobenzene modified hairpins.

|            | Found  | Calculated |            | Found  | Calculated |
|------------|--------|------------|------------|--------|------------|
| <b>1a</b>  | 2715.9 | 2714.8     | <b>1b</b>  | 2742.5 | 2742.9     |
| <b>2a</b>  | 2714.0 | 2713.8     | <b>2b</b>  | 2742.4 | 2741.9     |
| <b>3a</b>  | 2713.4 | 2712.8     | <b>3b</b>  | 2741.7 | 2740.9     |
| <b>4a</b>  | 3330.3 | 3330.2     | <b>4b</b>  | 3359.4 | 3358.3     |
| <b>5a</b>  | 3331.5 | 3330.2     | <b>5b</b>  | 3359.6 | 3358.3     |
| <b>6a</b>  | 3332.6 | 3330.2     | <b>6b</b>  | 3360.2 | 3358.3     |
| <b>7a</b>  | 3331.9 | 3329.2     | <b>7b</b>  | 3359.6 | 3357.3     |
| <b>8a</b>  | 3331.0 | 3329.2     | <b>8b</b>  | 3357.5 | 3357.3     |
| <b>9a</b>  | 3329.7 | 3329.2     | <b>9b</b>  | 3358.0 | 3357.3     |
| <b>10a</b> | 3947.2 | 3946.6     | <b>10b</b> | 3975.6 | 3974.7     |



**Figure S11.** MALDI-TOF-MS of azobenzene modified ODNs.

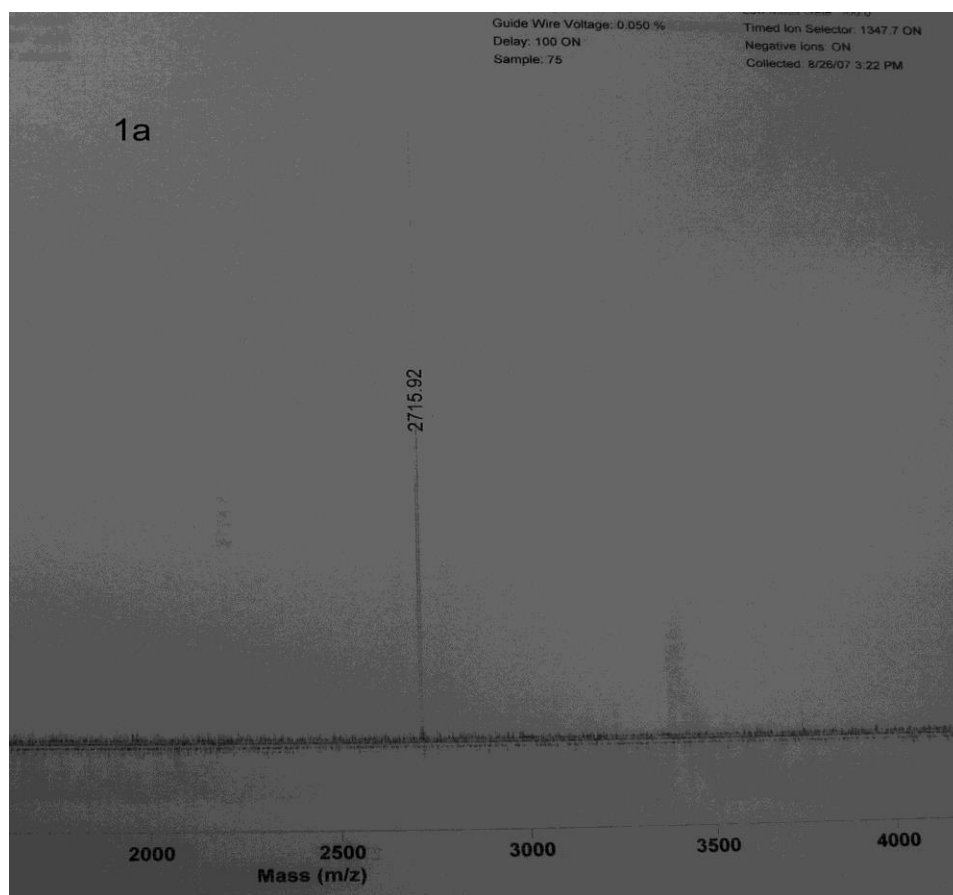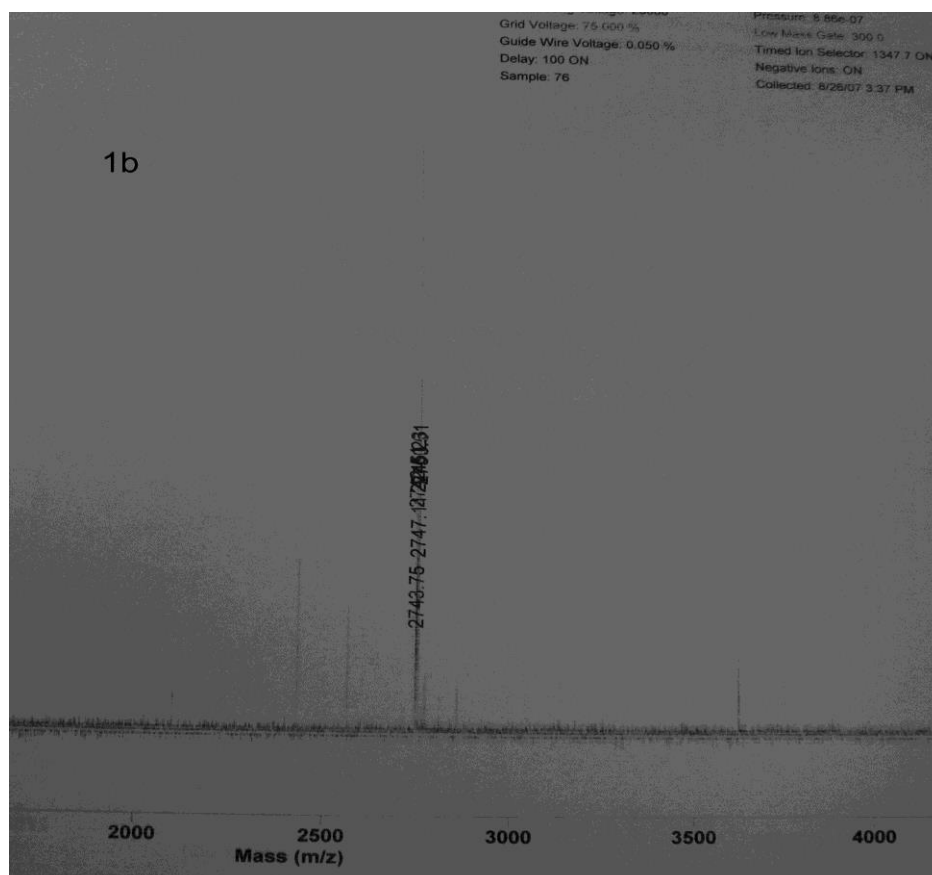

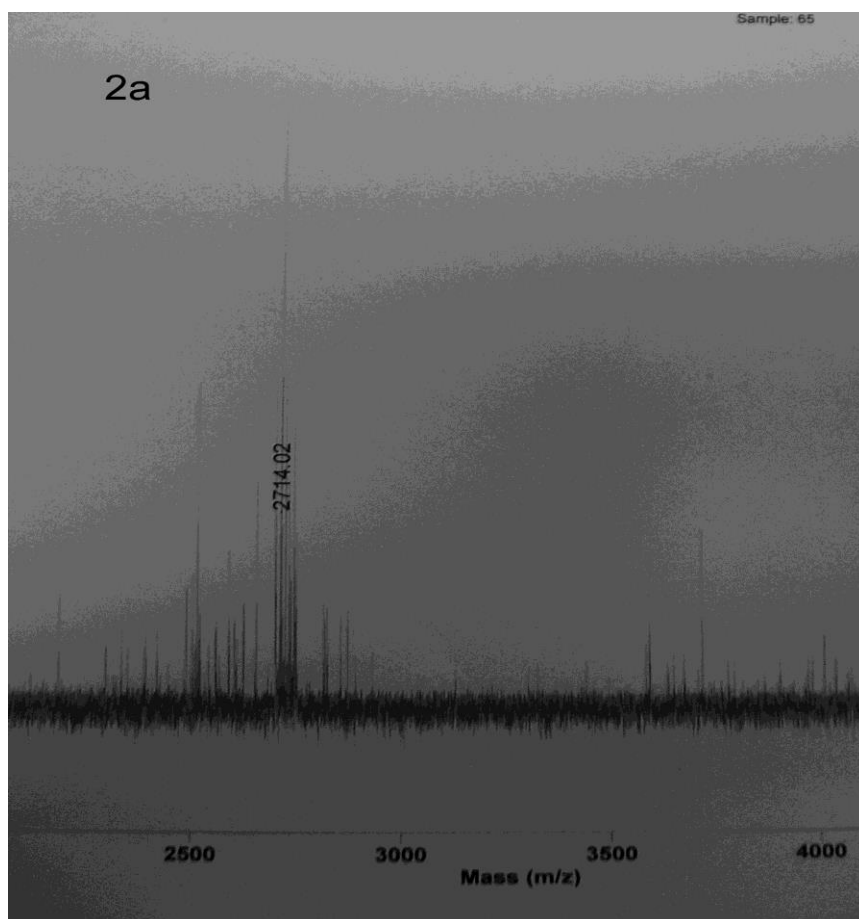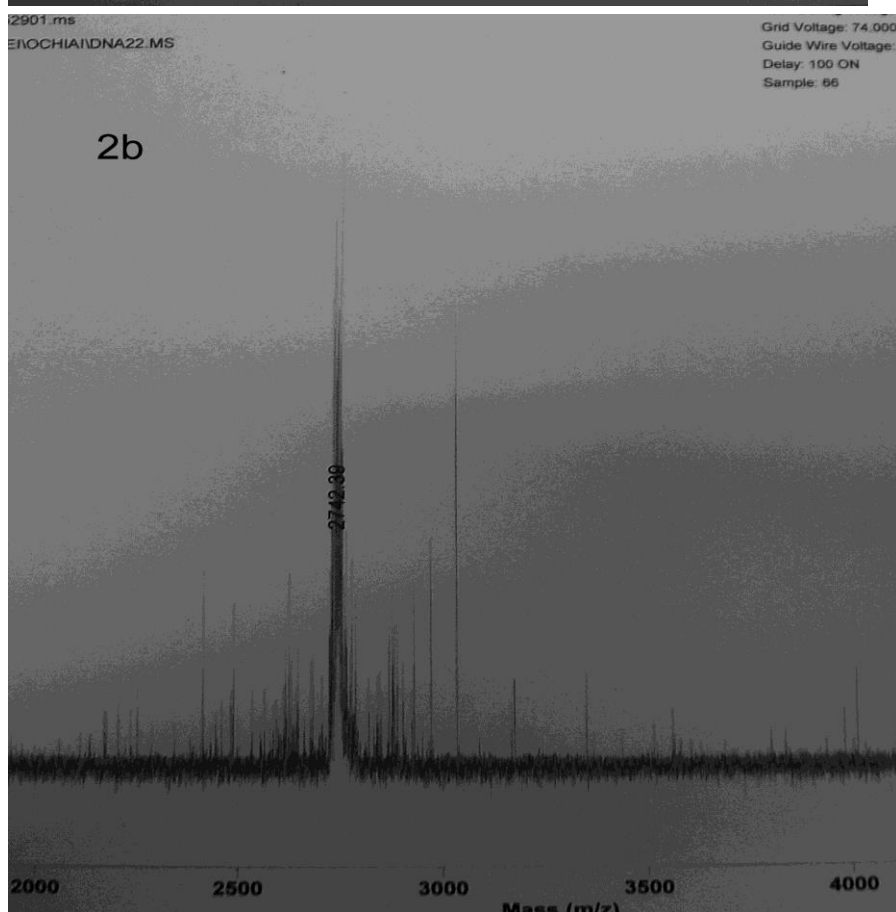

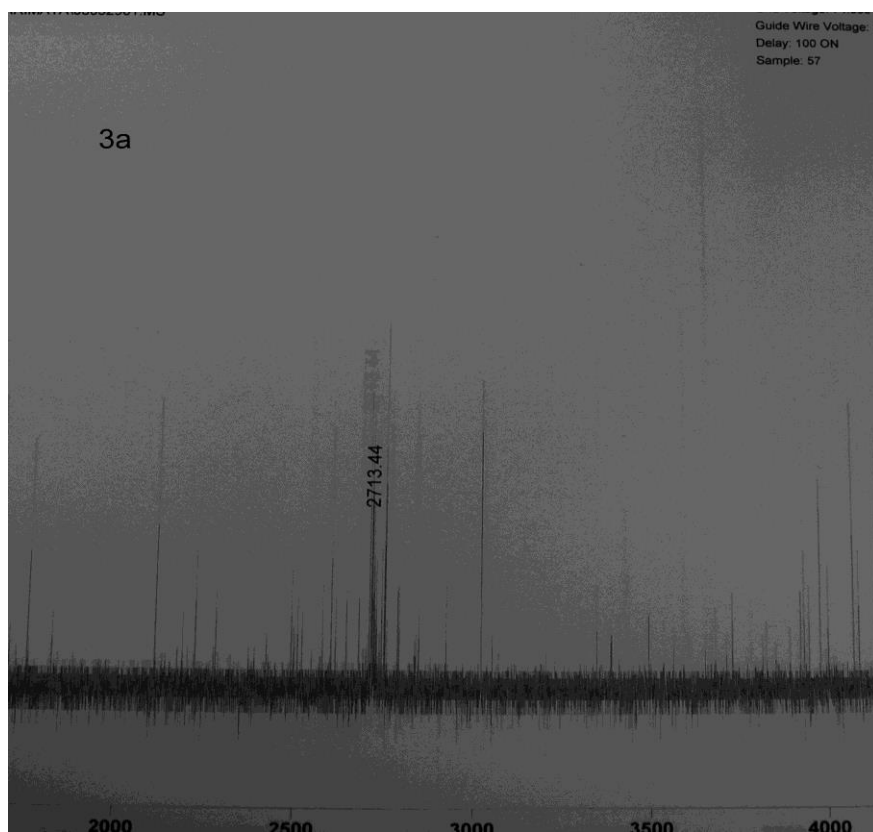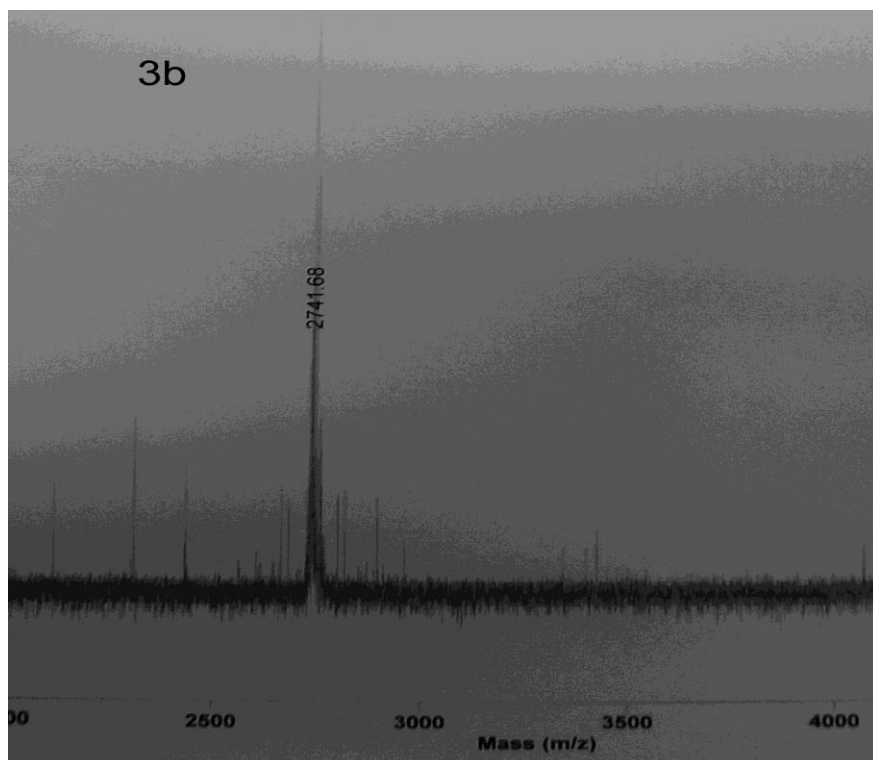

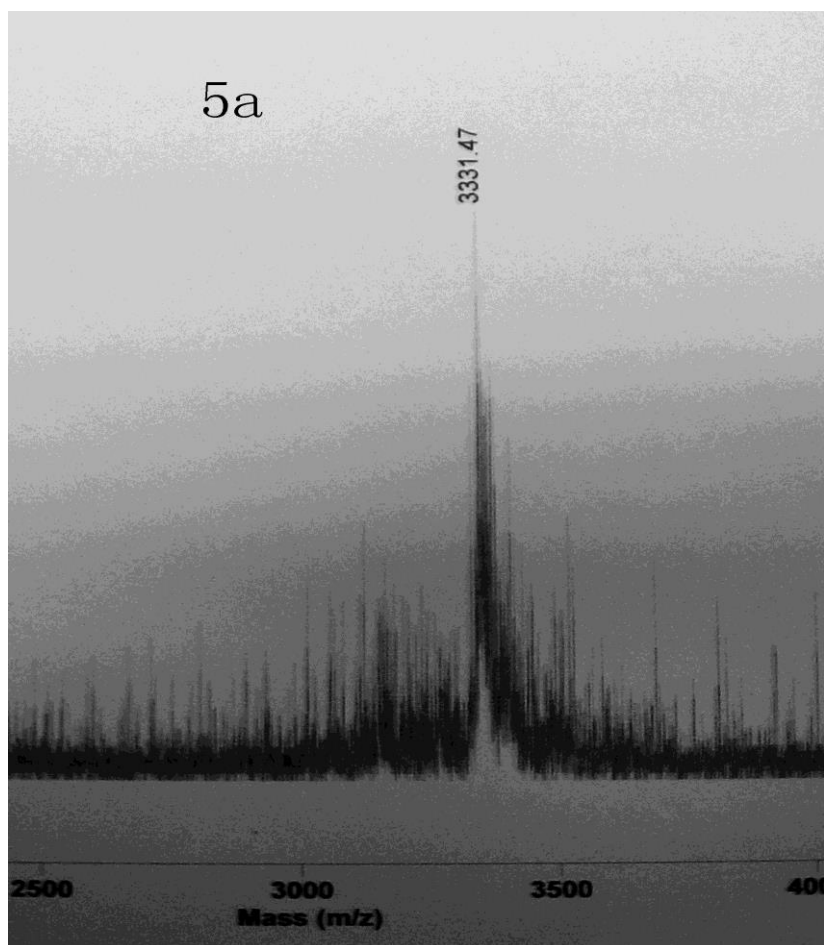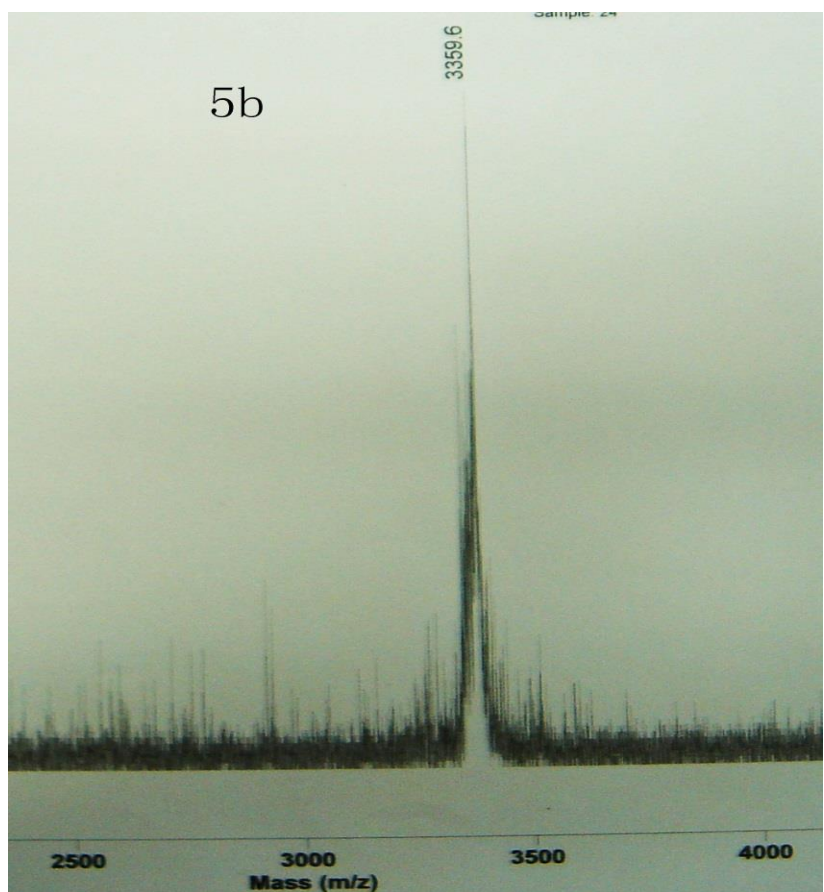

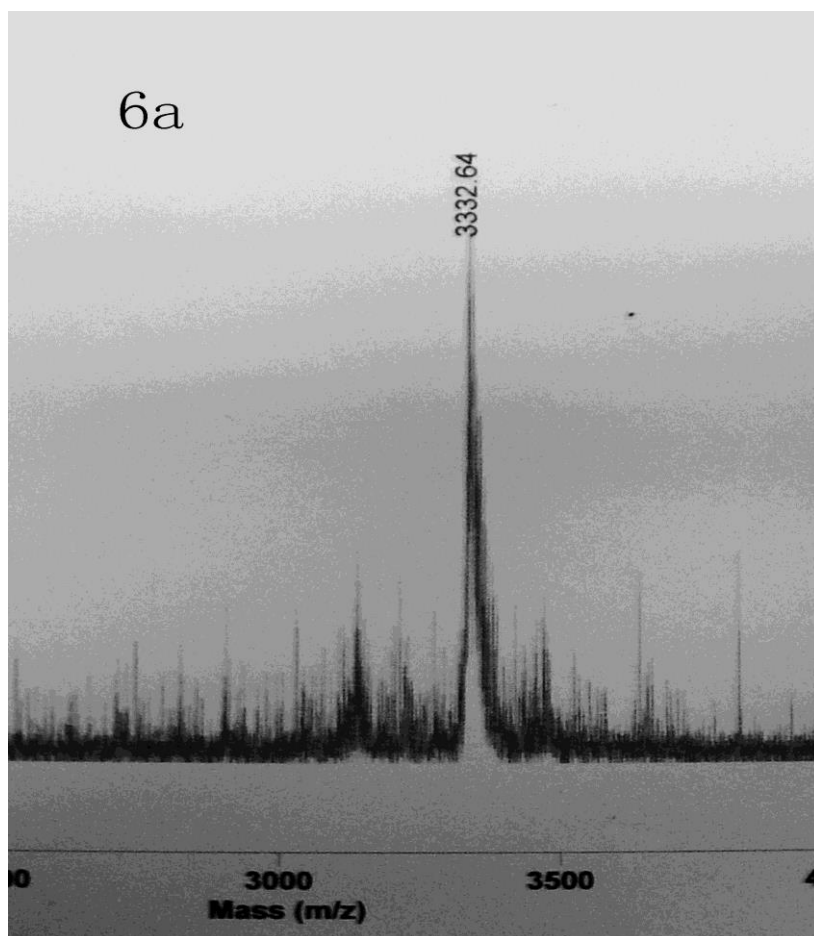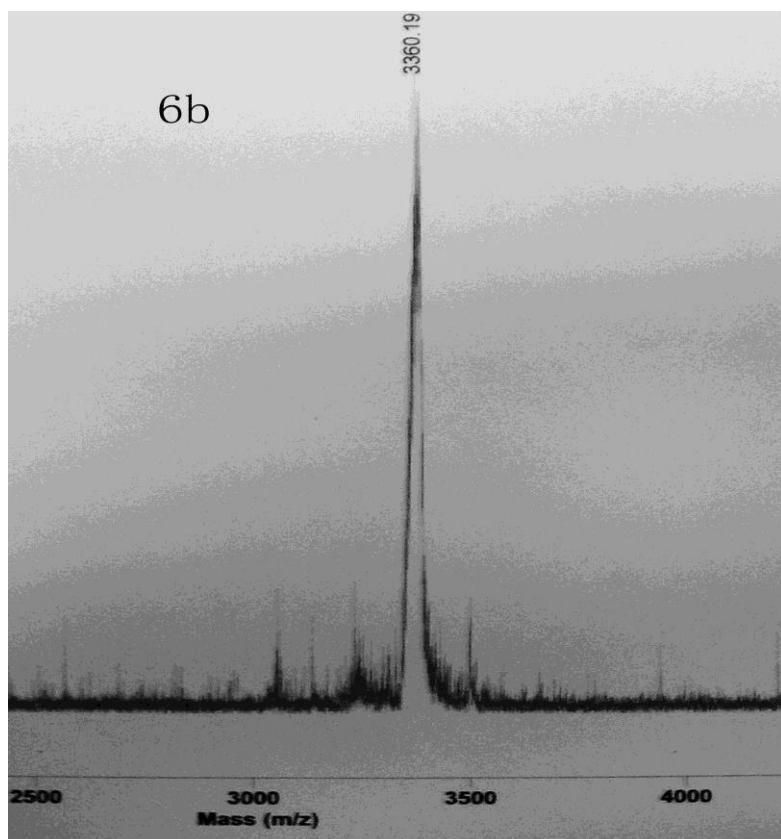

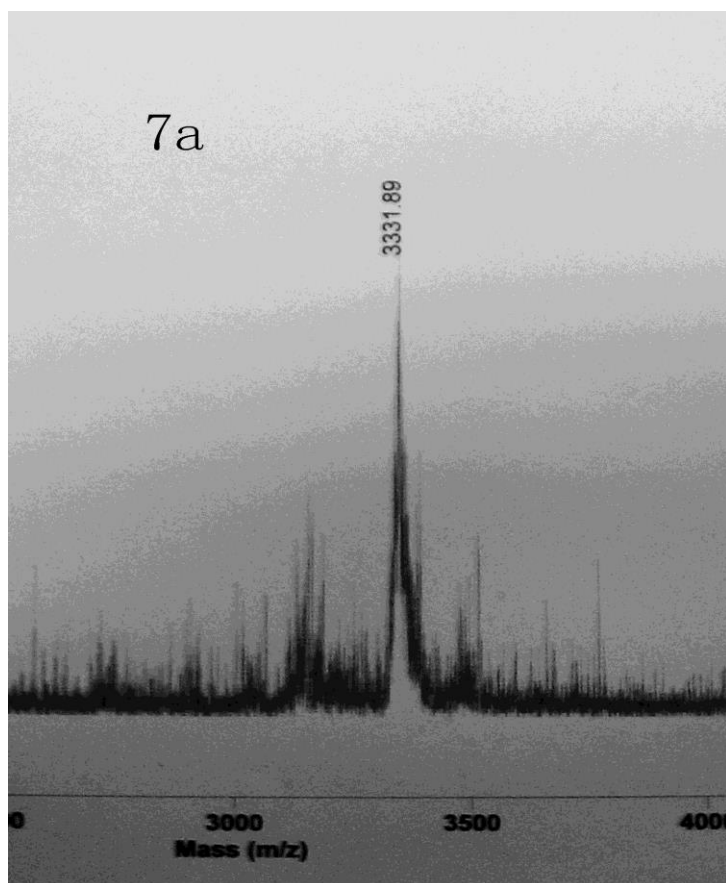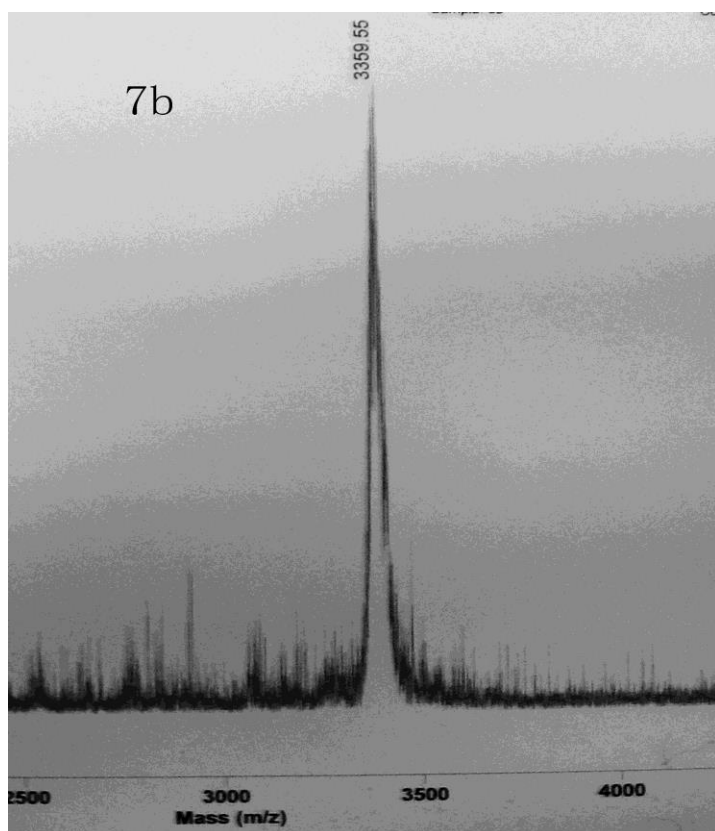

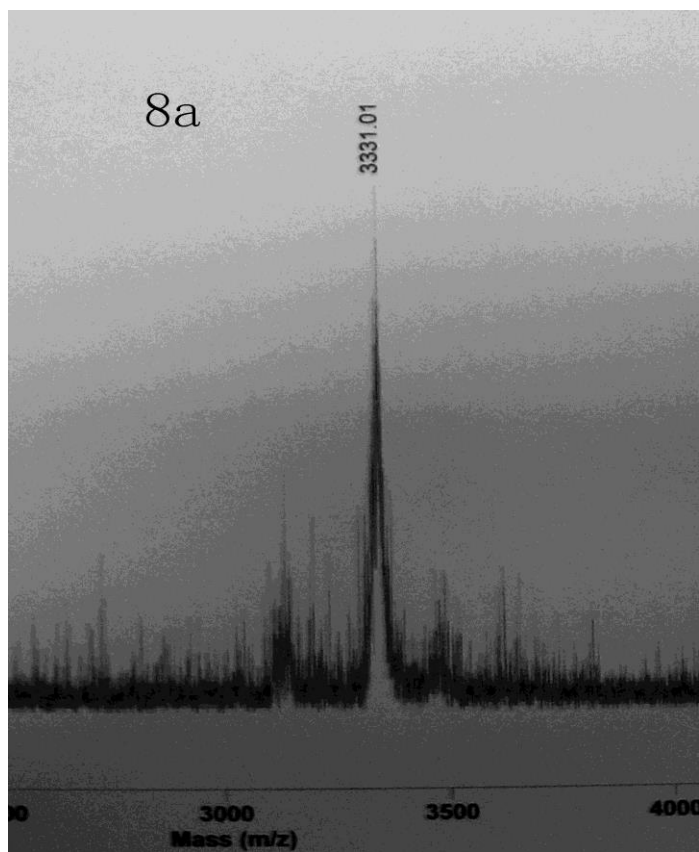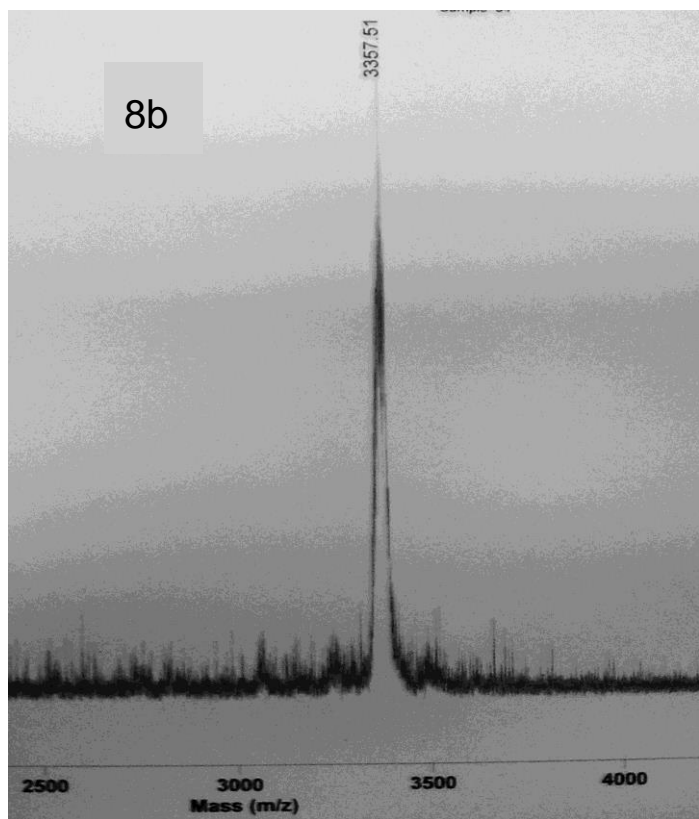

Supplement: c4md00378k1.pdf [file c4md00378k1.pdf]
